# Supplementary material for: Relaxins enhance growth of spontaneous murine breast cancers as well as metastatic colonization of the brain
Source: Springer Nature journal article supplement (doi:10.1007/s10585-013-9609-2), 2013-08-20
Supplement: MOESM1 [file 8861740]

## Suppl. Figure 1

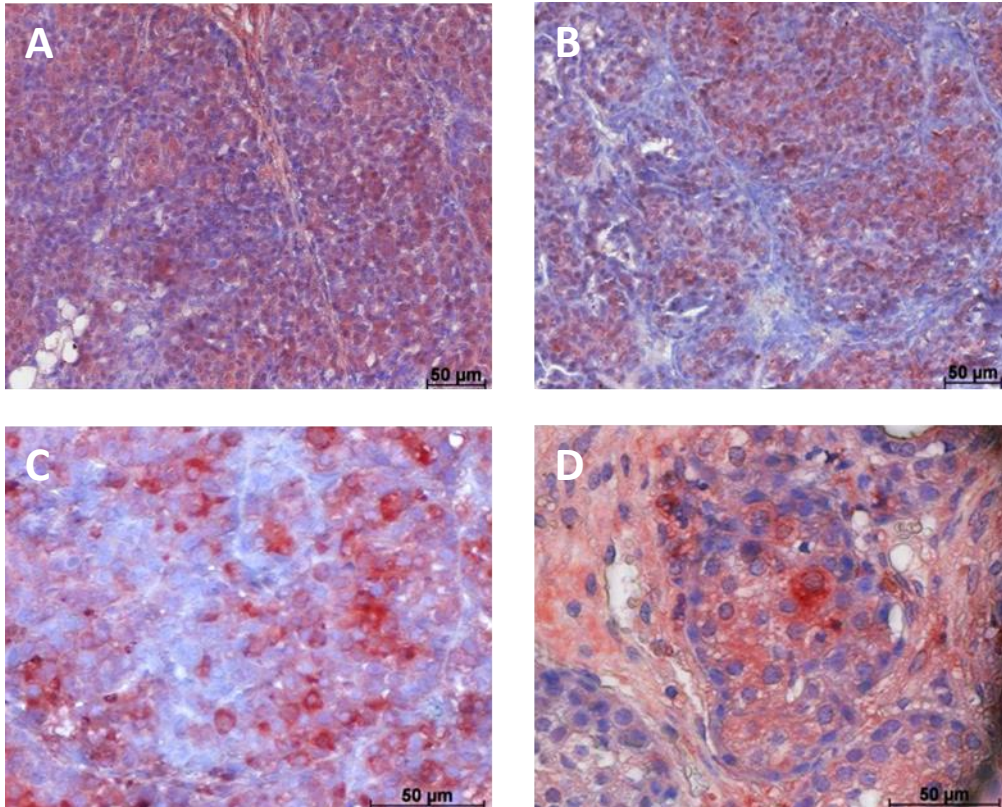

Immunohistochemical detection of relaxin expression in Tg(MMTV-erbB2) mouse breast cancers showing focal as well as diffuse positivity of the tumour cells without any difference between controls and relaxin-treated animals:

A, C = controls

B, D = + relaxin

A, B = magnification 20x

C, D = magnification 40x
